# Supplementary material
Source: PubMed Central journal article supplement (PMC5614827)

## SUPPLEMENTAL MATERIAL

**Supplemental Table 1.** Outcome Ascertainment in HealthLNK and MESA

**Supplemental Table 2.** Summary of data types and data completeness in HealthLNK for sample of 802 participants

**Supplemental Table 3.** Comparison of gender in HealthLNK and MESA

**Supplemental Table 4.** Comparison of race/ethnicity in HealthLNK and MESA

**Supplemental Table 5.** Performance of HTN algorithm in HealthLNK with ICD-9 codes alone using MESA as the criterion standard

**Supplemental Table 6.** Performance of HTN algorithm with ICD-9 codes and clinical data in HealthLNK using MESA as the criterion standard

**Supplemental Table 7.** Performance of obesity algorithm using ICD-9 codes alone in HealthLNK using MESA as the criterion standard

**Supplemental Table 8.** Performance of obesity algorithm with ICD-9 codes and clinical data in HealthLNK using MESA as the criterion standard

**Supplemental Table 9.** Performance of diabetes algorithm with ICD-codes only in HealthLNK using MESA as criterion standard

**Supplemental Table 10.** Performance of diabetes algorithm with ICD-9 codes and clinical data in HealthLNK using MESA as criterion standard

**Supplemental Table 11.** HealthLNK data types for the 280 individuals with hypertension identified in HealthLNK and MESA

**Supplemental Table 12.** HealthLNK data types for the 111 individuals with obesity identified in HealthLNK and MESA

**Supplemental Table 13.** HealthLNK data types for the 71 individuals with diabetes identified in HealthLNK and MESA

**Supplemental Figure 1.** Bland-Altman plots for MESA and HealthLNK diastolic blood pressure

**Supplemental Figure 2.** Fluctuation diagram for systolic blood pressure

**Supplemental Figure 3.** Fluctuation diagram for diastolic blood pressure

**Supplemental Figure 4.** Fluctuation diagram for body mass index

**Supplemental Figure 5.** Diagram of concordant and discordant strokes in MESA and potential strokes in HealthLNK

**Supplemental Figure 6.** Diagram of concordant and discordant heart failure events in MESA and potential heart failure events in HealthLNK

**Supplemental Figure 7.** Sensitivity analysis for blood pressure measurements

**Supplemental Figure 8.** Sensitivity analysis for body mass index measurements

**Supplemental Table 1.** Outcome ascertainment in HealthLNK and MESA

| Outcome                      | MESA                                                                                                                                                                                                                                                                                                                                                                                                              | HealthLNK                                                                                                                                                                                                                                                          |                                                                                                                                                                                                                                         |
|------------------------------|-------------------------------------------------------------------------------------------------------------------------------------------------------------------------------------------------------------------------------------------------------------------------------------------------------------------------------------------------------------------------------------------------------------------|--------------------------------------------------------------------------------------------------------------------------------------------------------------------------------------------------------------------------------------------------------------------|-----------------------------------------------------------------------------------------------------------------------------------------------------------------------------------------------------------------------------------------|
|                              |                                                                                                                                                                                                                                                                                                                                                                                                                   | Sensitive Criteria                                                                                                                                                                                                                                                 | Specific Criteria                                                                                                                                                                                                                       |
| <b>Myocardial Infarction</b> | - Based on combination of symptoms, ECG abnormalities, and cardiac biomarkers and classified into definite or probable                                                                                                                                                                                                                                                                                            | - ICD-9 codes 410.X, 410.XX in any position for inpatient or outpatient encounter<br><br>OR<br><br>- Troponin > upper limit of normal                                                                                                                              | - ICD-9 codes 410.X, 410.XX in any position for inpatient encounter<br><br>with or without<br><br>- Troponin 2X > upper limit of normal or both                                                                                         |
| <b>Stroke</b>                | - Rapid onset of focal neurologic event lasting 24 hours or until death<br><br>AND<br><br>- Not secondary to brain trauma, tumor, infection, or other nonvascular cause<br><br>AND<br><br>- Clinically relevant lesion on brain imaging                                                                                                                                                                           | - ICD-9 codes 433.X1, 434.X1, 436, 362.3, 430.X, 431, 432 in any position for inpatient or outpatient encounter                                                                                                                                                    | - ICD-9 codes 433.X1, 434.X1, 436, 362.3, 430.X, 431, 432 in any position for inpatient encounter                                                                                                                                       |
| <b>Heart Failure</b>         | - Symptoms (dyspnea, edema)<br><br>- Definite heart failure required at least one of the following:<br>1) Pulmonary edema or congestion on chest x-ray<br>2) Dilated left ventricle and/or left ventricular systolic dysfunction<br>3) Diastolic dysfunction with elevated filling pressures<br><br>- Probable heart failure required either physician diagnosis or patient receiving treatment for heart failure | - ICD-9 codes 402.01, 402.11, 402.91, 404.01, 404.03, 404.11, 404.13, 404.91, 404.93, 428.XX in any position for inpatient encounter or two outpatient encounters<br><br>OR<br><br>- Intravenous diuretic<br><br>OR<br><br>- BNP > 100 pg/mL, pro-BNP > 2000 pg/mL | - ICD-9 codes 402.01, 402.11, 402.91, 404.01, 404.03, 404.11, 404.13, 404.91, 404.93, 428.XX in primary position for inpatient encounter<br><br>with or without<br><br>- Intravenous diuretic/<br>BNP > 100 pg/mL, pro-BNP > 2000 pg/mL |

**Supplemental Table 2.** Summary of data types and data completeness in HealthLNK for sample of 802 participants.

| <b>HealthLNK Data Types</b>             | <b>Number of participants, n (%)</b> |
|-----------------------------------------|--------------------------------------|
| <b>Demographics</b>                     | 771 (96.1)                           |
| <b>Diagnostic codes from encounters</b> | 696 (86.8)                           |
| <b>Diagnostic codes from procedures</b> | 591 (73.7)                           |
| <b>Medication data</b>                  | 576 (71.8)                           |
| <b>Vital signs data</b>                 | 588 (73.3)                           |
| <b>Laboratory data</b>                  | 584 (72.8)                           |
| <b>All six data types</b>               | 443 (55.2)                           |

**Supplemental Table 3.** Comparison of gender in HealthLNK and MESA

|      |        | HealthLNK |      |       |         |       |
|------|--------|-----------|------|-------|---------|-------|
|      |        | Female    | Male | Other | Missing | Total |
| MESA | Female | 408       | 4    | 5     | 21      | 438   |
|      | Male   | 1         | 343  | 6     | 14      | 364   |
|      | Total  | 409       | 347  | 11    | 35      | 802   |

**Supplemental Table 4.** Comparison of race/ethnicity in HealthLNK and MESA

|      |       | HealthLNK |       |       |          |       |         |       |
|------|-------|-----------|-------|-------|----------|-------|---------|-------|
|      |       | White     | Asian | Black | Hispanic | Other | Missing | Total |
| MESA | White | 344       | 1     | 2     | 1        | 12    | 79      | 439   |
|      | Asian | 2         | 70    | 0     | 0        | 33    | 29      | 134   |
|      | Black | 1         | 1     | 177   | 1        | 14    | 35      | 229   |
|      | Total | 347       | 72    | 179   | 2        | 59    | 143     | 802   |

**Supplemental Table 5.** Performance of HTN algorithm in HealthLNK with ICD-9 codes alone using MESA as the criterion standard

| HealthLNK | MESA           |                   |                  |
|-----------|----------------|-------------------|------------------|
|           | HTN<br>(n=340) | No HTN<br>(n=293) | Total<br>(n=633) |
| HTN       | 242            | 79                | 321              |
| No HTN    | 98             | 214               | 312              |

HealthLNK

Sensitivity: 71.2% (242/340)

Specificity: 73.0% (214/293)

Positive Predictive Value: 75.4% (242/321)

Negative Predictive Value: 68.6% (214/312)

**Supplemental Table 6.** Performance of HTN algorithm with ICD-9 codes and clinical data in HealthLNK using MESA as the criterion standard

| HealthLNK | MESA           |                   |                  |
|-----------|----------------|-------------------|------------------|
|           | HTN<br>(n=340) | No HTN<br>(n=293) | Total<br>(n=633) |
| HTN       | 280            | 119               | 399              |
| No HTN    | 60             | 174               | 234              |

HealthLNK

Sensitivity: 82.4% (280/340)

Specificity: 59.4% (174/293)

Positive Predictive Value: 70.2% (280/399)

Negative Predictive Value: 74.4% (174/234)

**Supplemental Table 7.** Performance of obesity algorithm using ICD-9 codes alone in HealthLNK using MESA as the criterion standard

| HealthLNK  | MESA               |                       |                  |
|------------|--------------------|-----------------------|------------------|
|            | Obesity<br>(n=152) | No Obesity<br>(n=481) | Total<br>(n=633) |
| Obesity    | 47                 | 12                    | 59               |
| No Obesity | 105                | 469                   | 574              |

HealthLNK

Sensitivity: 30.9% (47/152)

Specificity: 97.5% (469/481)

Positive Predictive Value: 79.7% (47/59)

Negative Predictive Value: 81.7% (469/574)

**Supplemental Table 8.** Performance of obesity algorithm with ICD-9 codes and clinical data in HealthLNK using MESA as the criterion standard

| HealthLNK  | MESA               |                       |                  |
|------------|--------------------|-----------------------|------------------|
|            | Obesity<br>(n=152) | No Obesity<br>(n=481) | Total<br>(n=633) |
| Obesity    | 111                | 49                    | 160              |
| No Obesity | 41                 | 432                   | 473              |

HealthLNK

Sensitivity: 73.0% (111/152)

Specificity: 89.8% (432/481)

Positive Predictive Value: 69.4% (111/160)

Negative Predictive Value: 91.3% (432/473)

**Supplemental Table 9.** Performance of diabetes algorithm with ICD-codes only in HealthLNK using MESA as criterion standard

| HealthLNK   | MESA               |                        |                                |
|-------------|--------------------|------------------------|--------------------------------|
|             | Diabetes<br>(n=89) | No Diabetes<br>(n=541) | Total<br>(n=630 <sup>a</sup> ) |
| Diabetes    | 69                 | 24                     | 93                             |
| No Diabetes | 20                 | 517                    | 537                            |

HealthLNK

Sensitivity: 77.5% (69/89)

Specificity: 95.6% (517/541)

Positive Predictive Value: 74.2% (69/93)

Negative Predictive Value: 96.3% (517/537)

**Supplemental Table 10.** Performance of diabetes algorithm with ICD-9 codes and clinical data in HealthLNK using MESA as criterion standard

| HealthLNK   | MESA               |                        |                                |
|-------------|--------------------|------------------------|--------------------------------|
|             | Diabetes<br>(n=89) | No Diabetes<br>(n=541) | Total<br>(n=630 <sup>*</sup> ) |
| Diabetes    | 71                 | 36                     | 107                            |
| No Diabetes | 18                 | 505                    | 523                            |

HealthLNK

Sensitivity: 79.8% (71/89)

Specificity: 93.3% (505/541)

Positive Predictive Value: 66.4% (71/107)

Negative Predictive Value: 96.6% (505/523)

\* Three participants from the sample of 633 due to missing diabetes status in MESA  
Supplemental Table III. HealthLNK data types for 71 individuals with diabetes identified in HealthLNK and MESA



**Supplemental Table 11.** HealthLNK data types for the 280 individuals with hypertension identified in HealthLNK and MESA

| ICD-9 | Medication | Elevated Blood Pressure Measurement | Frequency (%)<br>n=280 |
|-------|------------|-------------------------------------|------------------------|
| Yes   | Yes        | Yes                                 | 107 (38.2%)            |
| Yes   | Yes        | --                                  | 62 (22.1%)             |
| Yes   | --         | Yes                                 | 27 (9.6%)              |
| Yes   | --         | --                                  | 46 (16.4%)             |
| --    | Yes        | Yes                                 | 10 (3.6%)              |
| --    | Yes        | --                                  | 18 (6.4%)              |
| --    | --         | Yes                                 | 10 (3.6%)              |

**Supplemental Table 12.** HealthLNK data types for the 111 individuals with obesity identified in HealthLNK and MESA

| ICD-9 | Body Mass Index Measurement | Frequency (%)<br>n=111 |
|-------|-----------------------------|------------------------|
| Yes   | Yes                         | 43 (38.7%)             |
| Yes   | --                          | 4 (3.6%)               |
| --    | Yes                         | 64 (57.7%)             |

**Supplemental Table 13.** HealthLNK data types for the 71 individuals with diabetes identified in HealthLNK and MESA

| <b>ICD-9</b> | <b>Medication</b> | <b>Elevated Hemoglobin A1C</b> | <b>Frequency (%)<br/>n=71</b> |
|--------------|-------------------|--------------------------------|-------------------------------|
| Yes          | Yes               | Yes                            | 2 (2.8%)                      |
| Yes          | Yes               | --                             | 47 (66.2%)                    |
| Yes          | --                | Yes                            | 0 (0%)                        |
| Yes          | --                | --                             | 20 (28.2%)                    |
| --           | Yes               | Yes                            | 0 (0%)                        |
| --           | Yes               | --                             | 2 (2.8%)                      |
| --           | --                | Yes                            | 0 (0%)                        |

**Supplemental Figure 1.** Bland-Altman plots for MESA and HealthLNK diastolic blood pressure

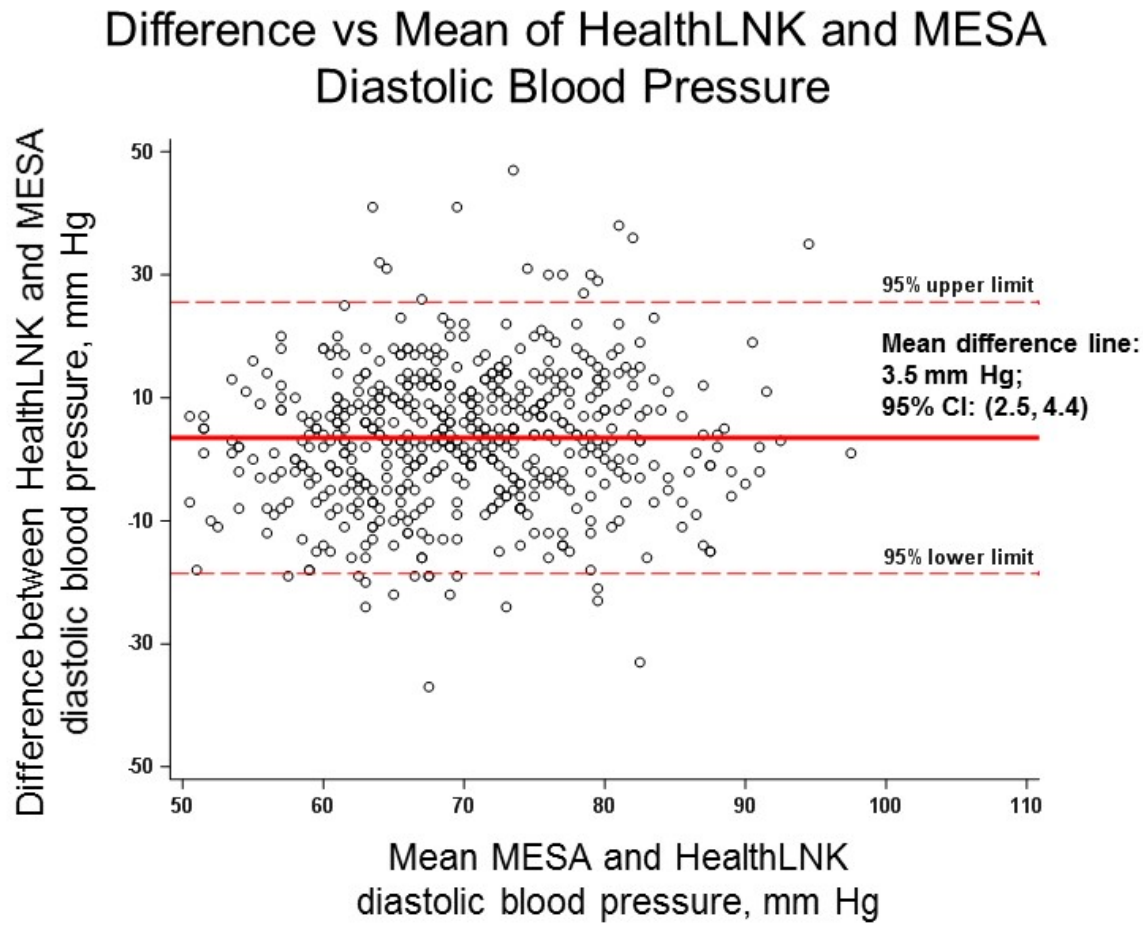

**Supplemental Figure 2.** Fluctuation diagram for systolic blood pressure

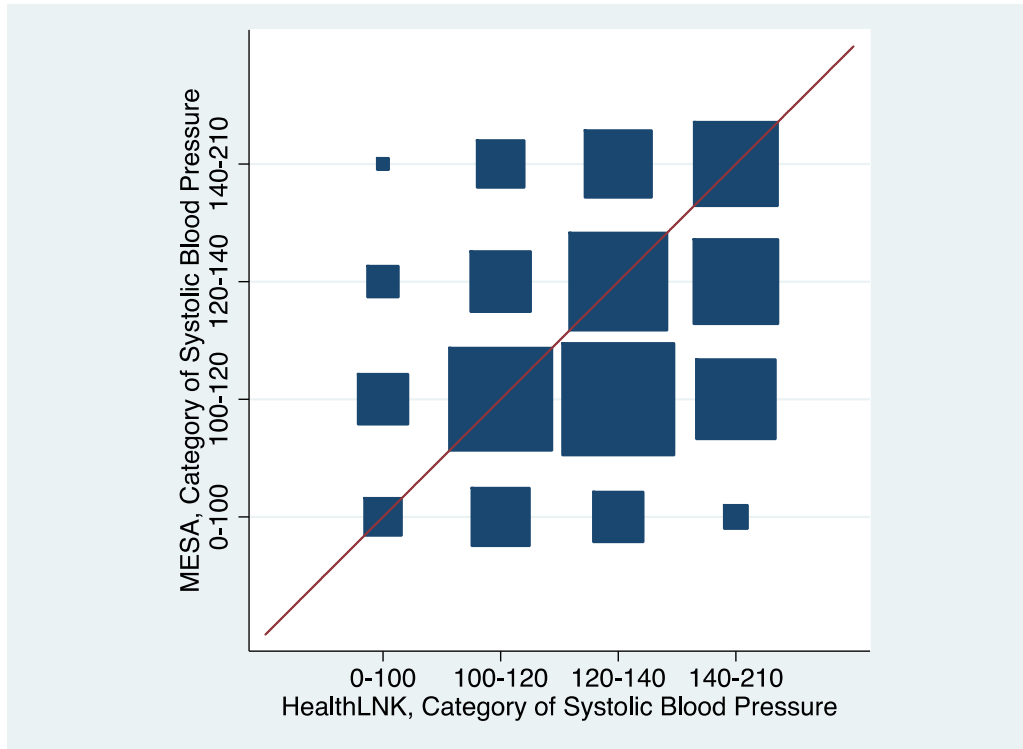

**Supplemental Figure 3.** Fluctuation diagram for diastolic blood pressure

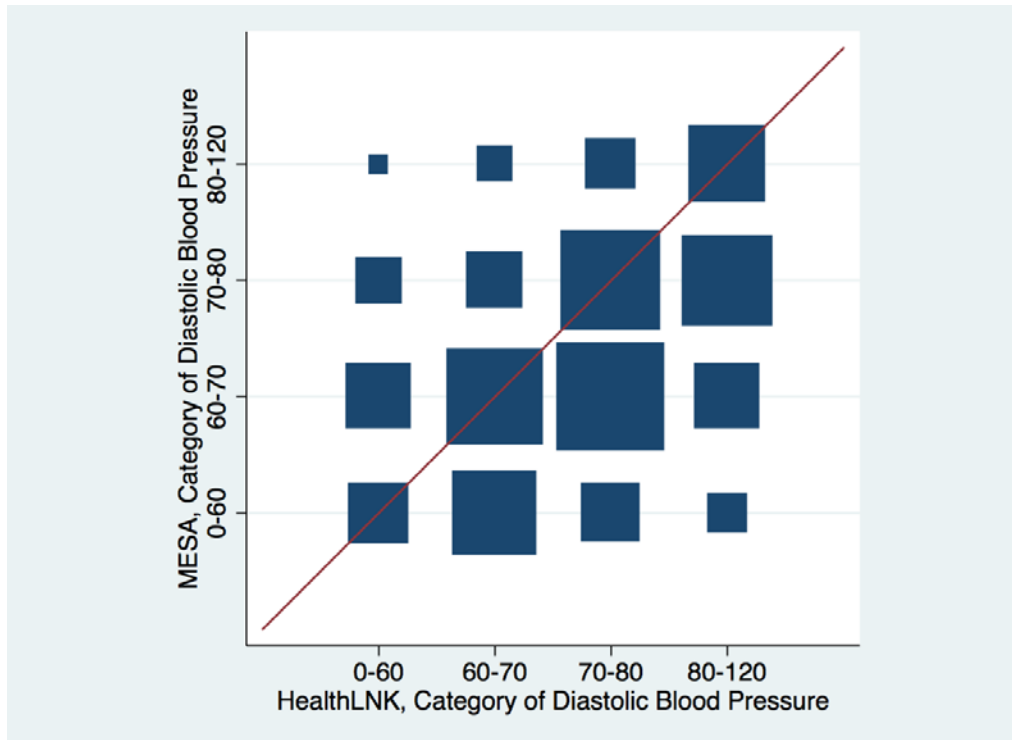

**Supplemental Figure 4.** Fluctuation diagram for body mass index

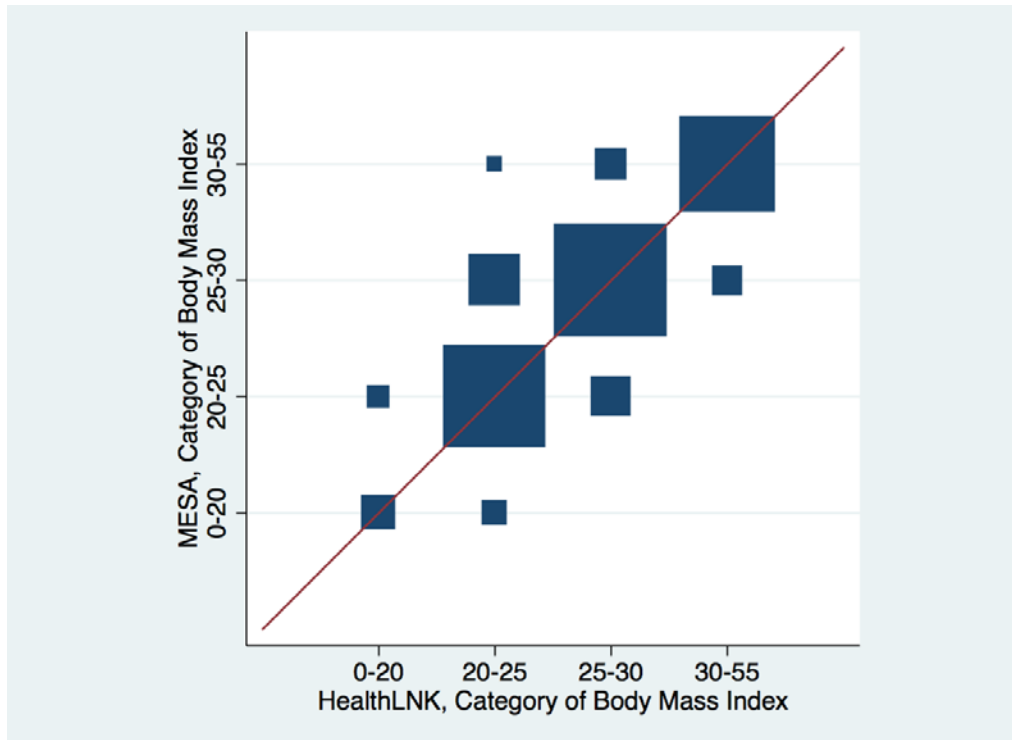

**Supplemental Figure 5.** Diagram of concordant and discordant strokes in MESA and potential strokes in HealthLNK

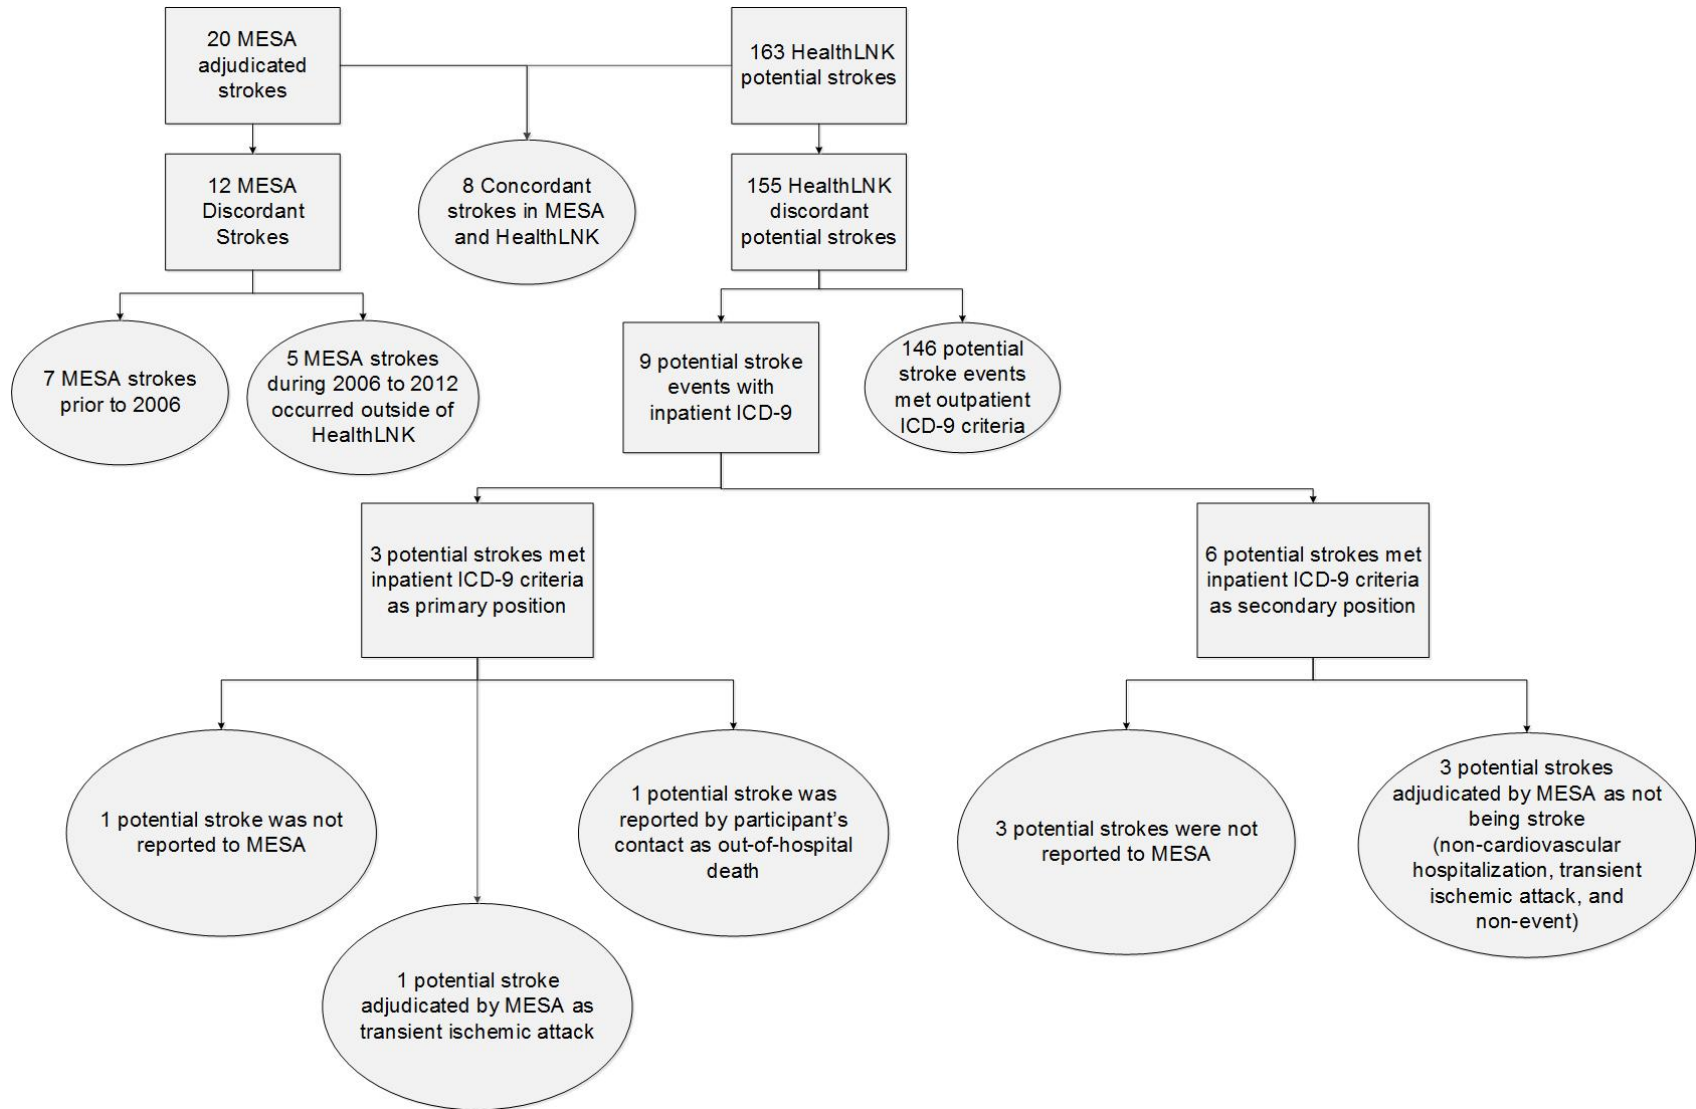

**Supplemental Figure 6.** Diagram of concordant and discordant heart failure events in MESA and potential heart failure events in HealthLNK. BNP = Brain Natriuretic Peptide

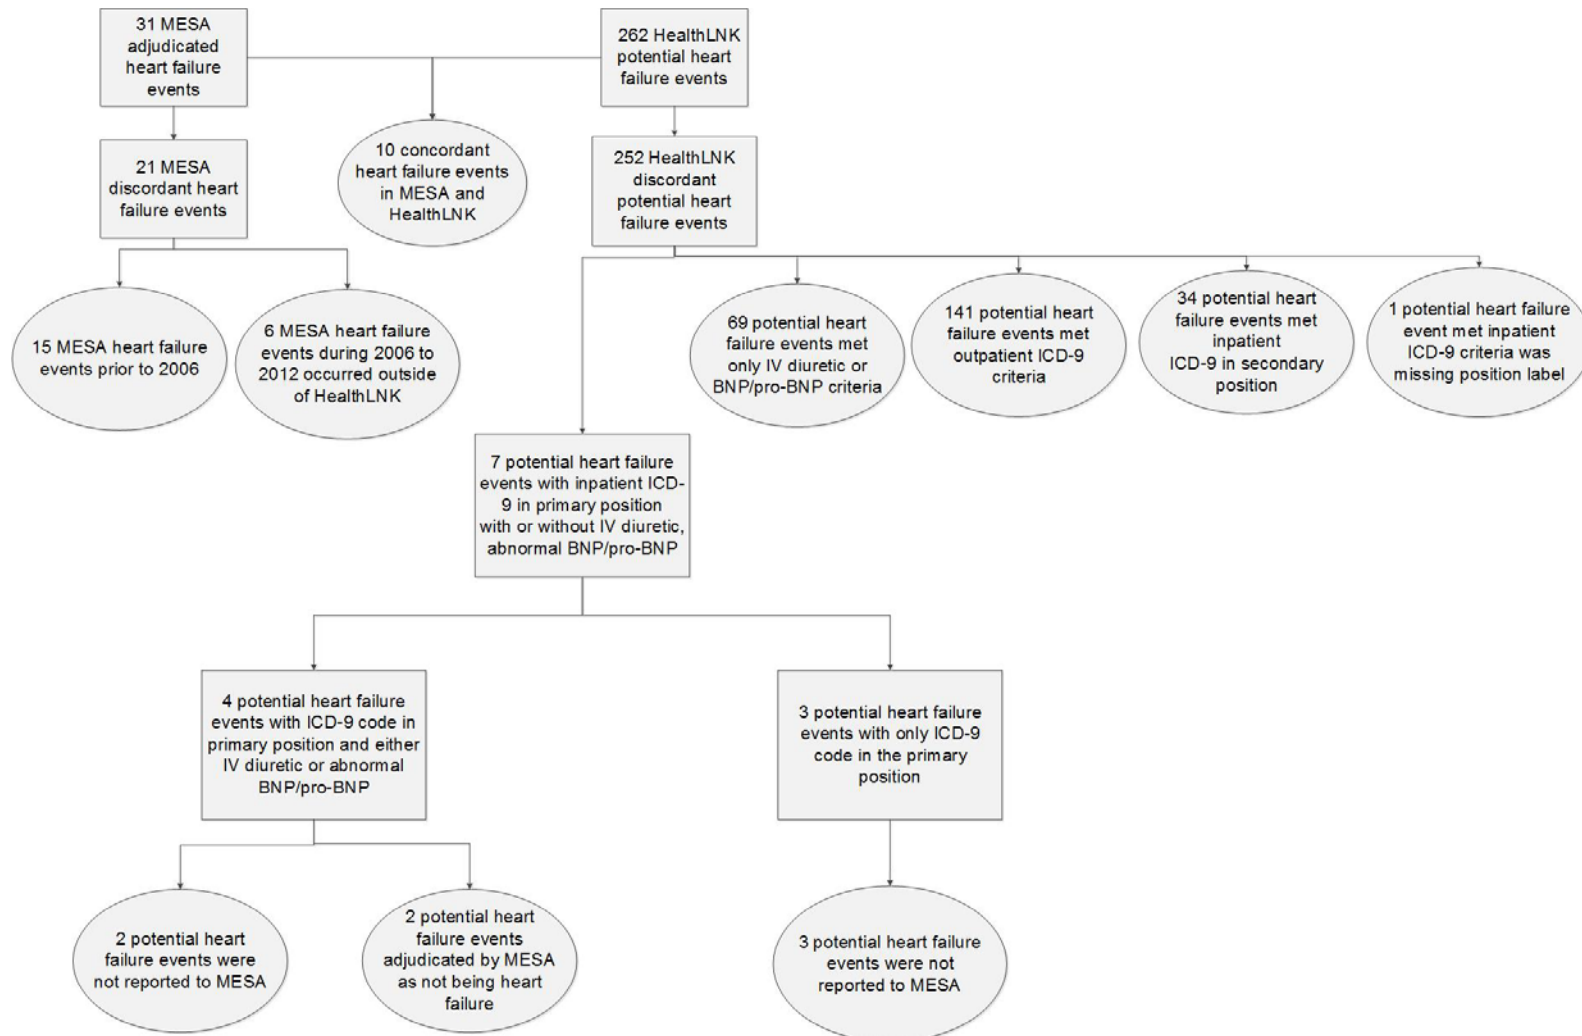



**Supplemental Figure 7.** Sensitivity analysis for blood pressure measurements

A. Systolic blood pressure measurement within one year of MESA examination date (n=352)

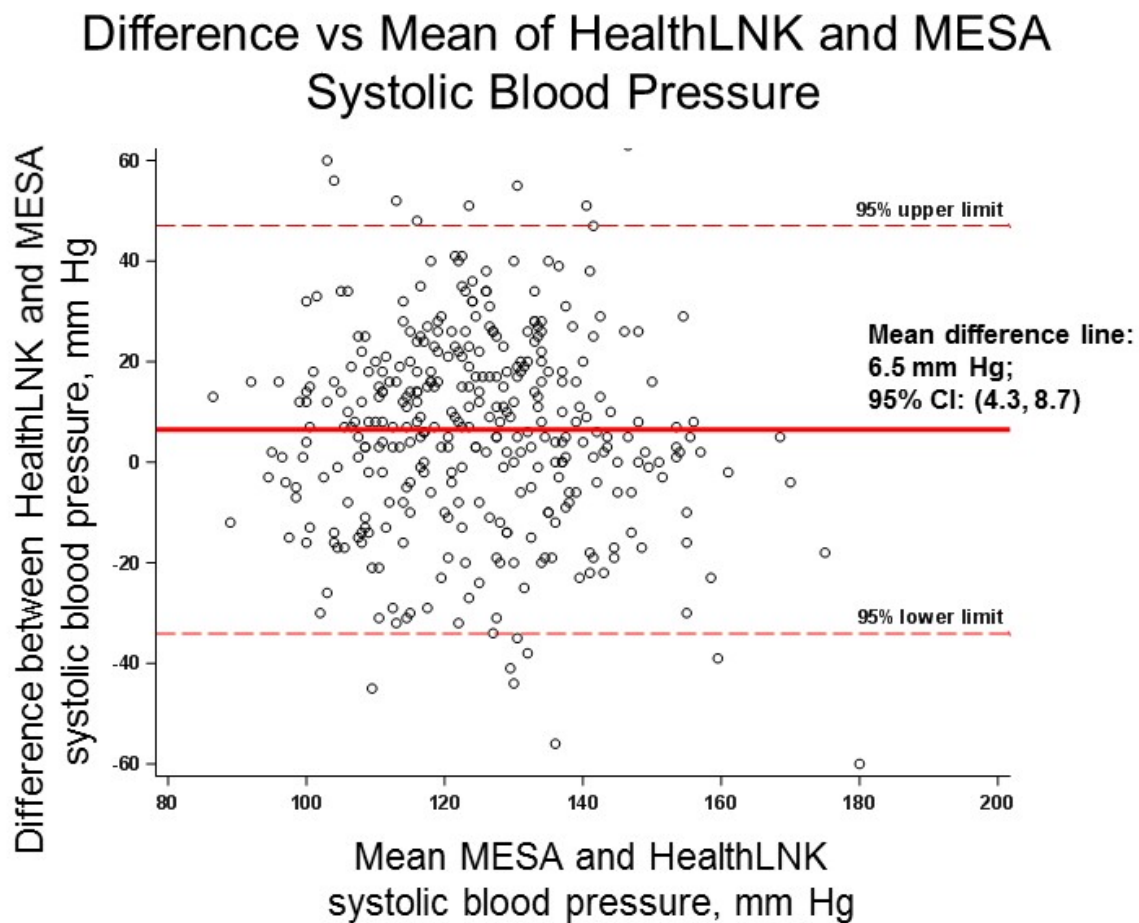

B. Diastolic blood pressure measurement within one year of MESA examination date (n=185)

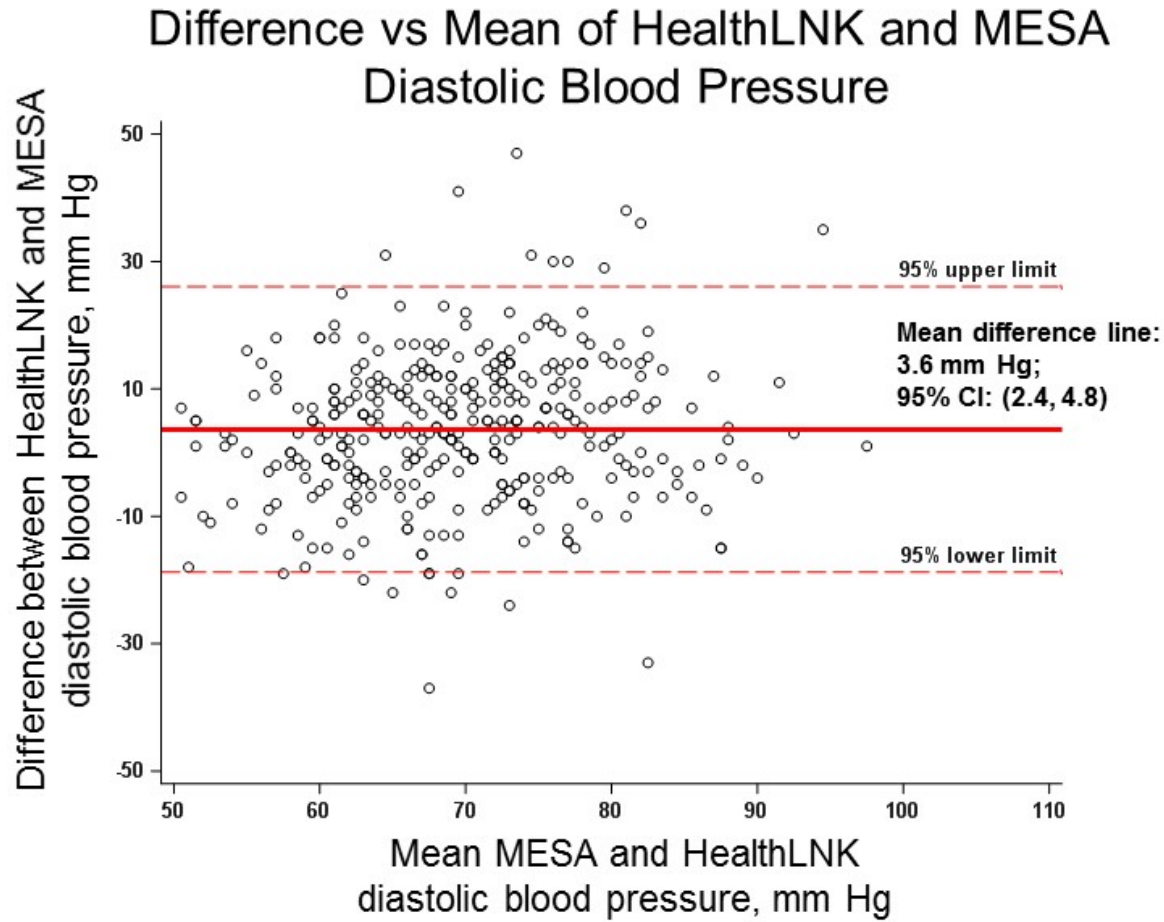

C. Systolic blood pressure measurement within three months of MESA examination date (n=352)

### Difference vs Mean of HealthLNK and MESA Systolic Blood Pressure

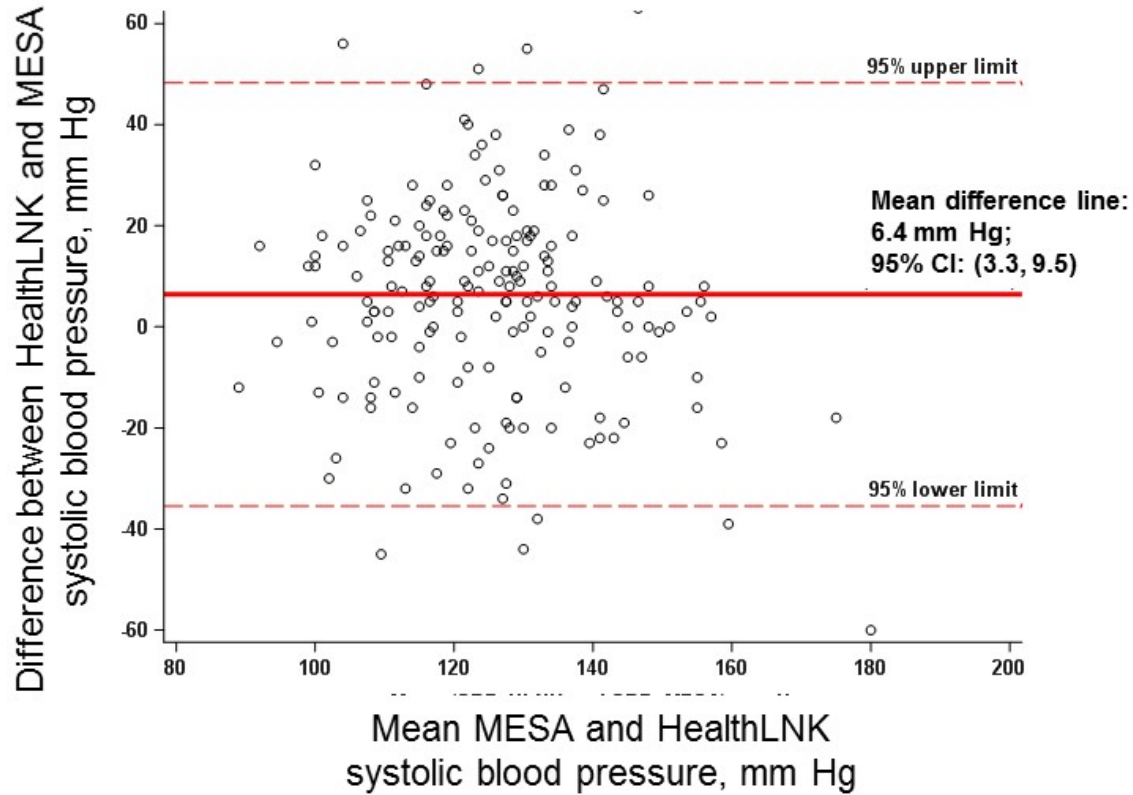

D. Diastolic blood pressure measurement within three months of MESA examination date (n=185)

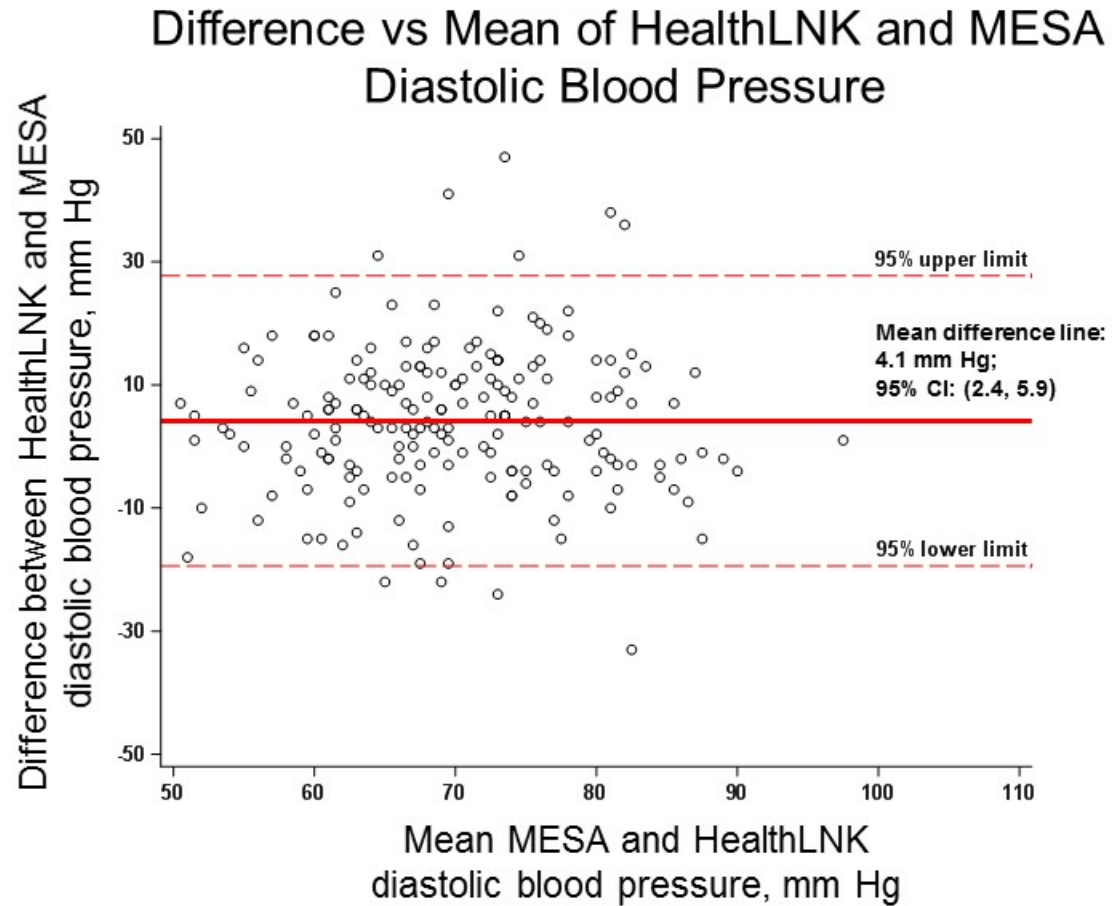

**Supplemental Figure 8.** Sensitivity analysis for body mass index measurements

A. Body mass index measurement within one year of MESA examination date (n=262)

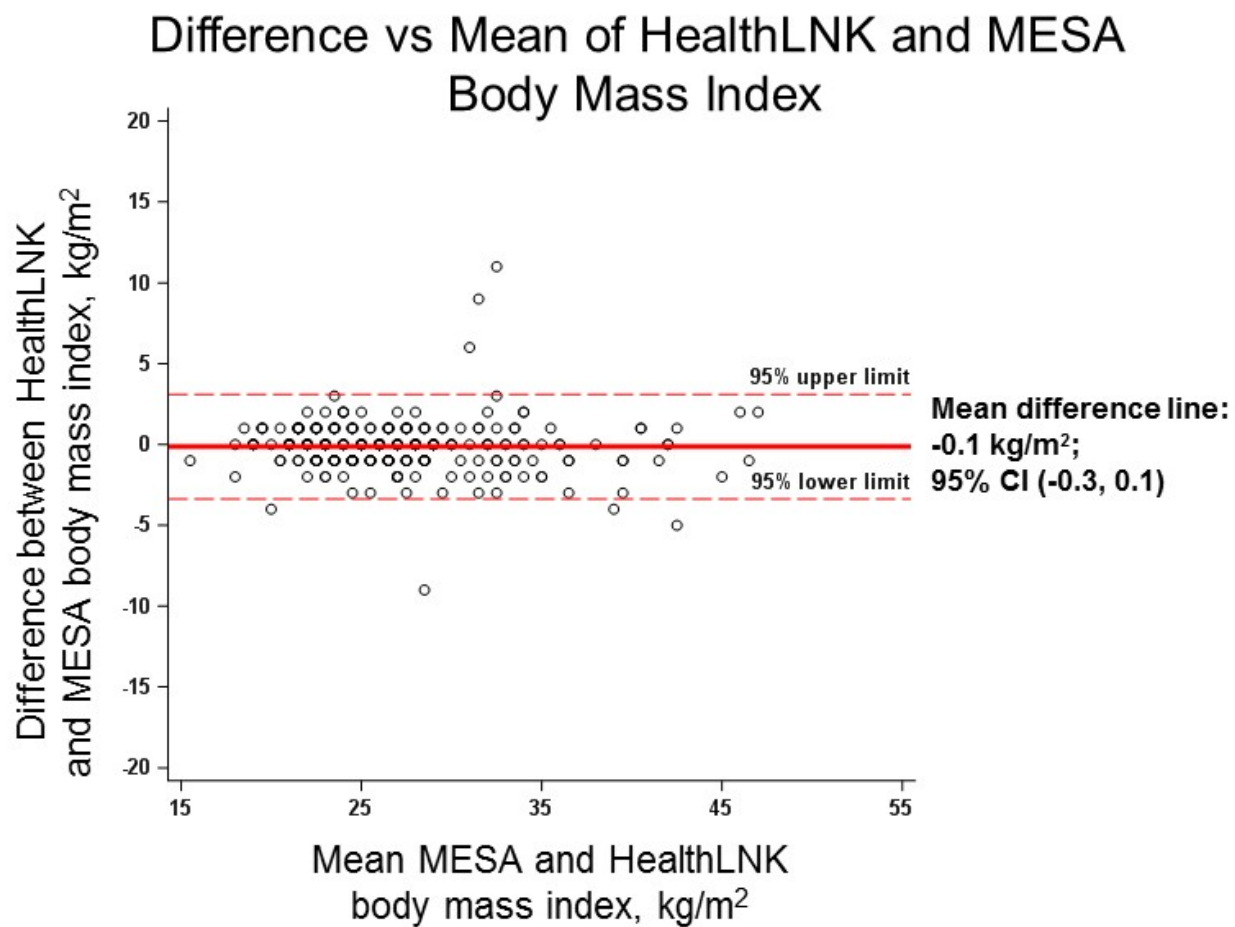

B. Body mass index measurement within three months of MESA examination date (n=139)

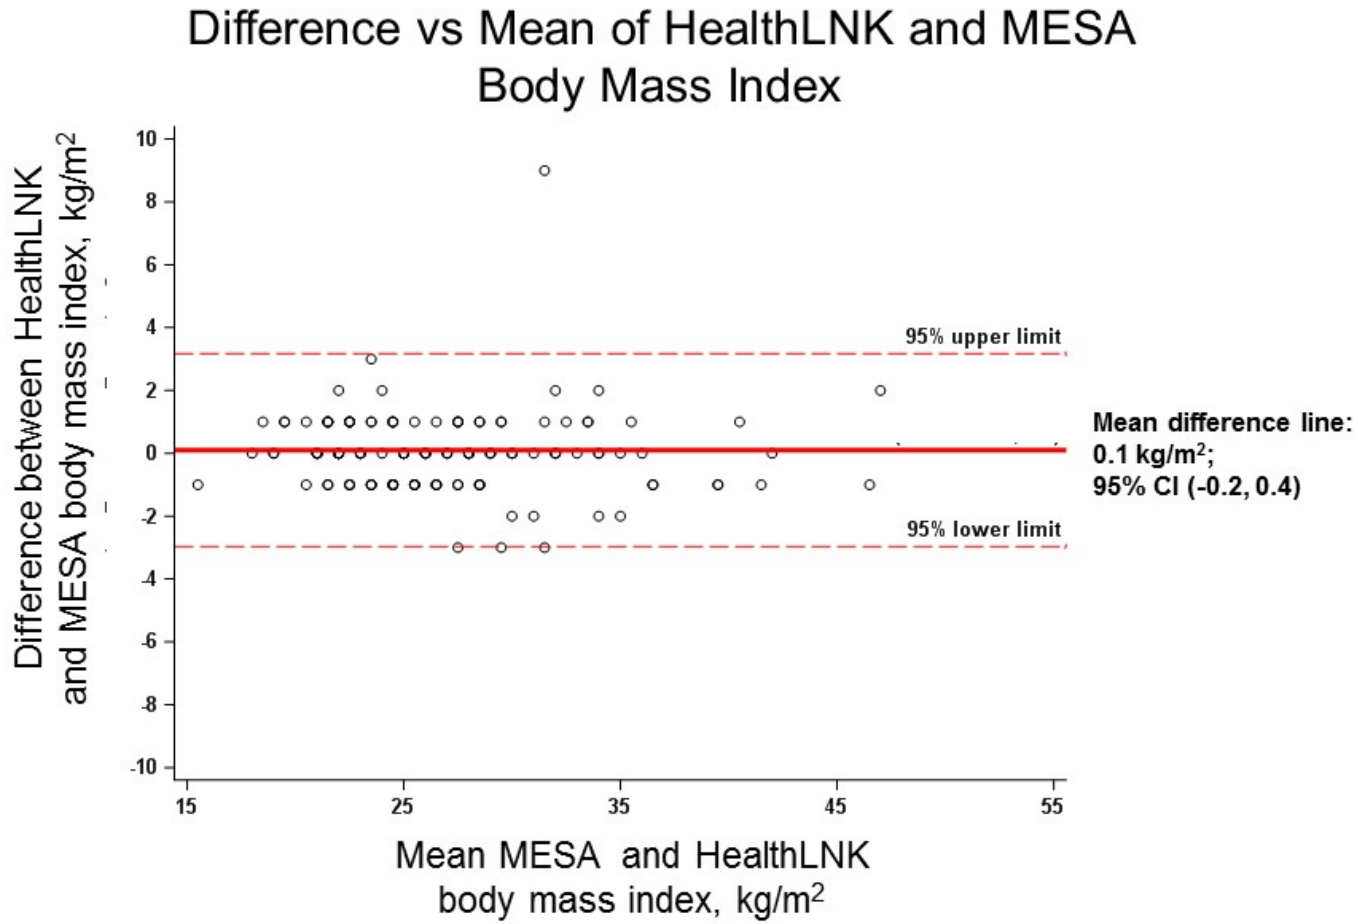

Supplement: NIHMS891941-supplement-Supp_PDF.pdf [file NIHMS891941-supplement-Supp_PDF.pdf]
